# Supplementary material for: Effectiveness of Oral Nirmatrelvir/Ritonavir vs. Intravenous Three-Day Remdesivir in Preventing Progression to Severe COVID-19: A Single-Center, Prospective, Comparative, Real-Life Study
Source: MDPI journal article supplement (doi:10.3390/v15071515), 2023-07-07
Supplement: s1 [file s1]

**Supplementary Table 1:** Univariable analysis in the group of 3RDV treated patients depending on the primary outcome of hospitalization at 30 days.

|                            | N (%) or mean $\pm$ SD or median [IQR 25, 75] |                         | p     |
|----------------------------|-----------------------------------------------|-------------------------|-------|
|                            | No hospitalization<br>(345)                   | Hospitalization<br>(10) |       |
| <b>Age (years)</b>         | 59.9 $\pm$ 17.6                               | 70.4 $\pm$ 13.9         | 0.061 |
| <b>Male gender</b>         | 190 (55.1)                                    | 7 (70)                  | 0.522 |
| <b>Medical history</b>     |                                               |                         |       |
| COPD/asthma                | 22 (6.4)                                      | 0 (0)                   | 1     |
| Hypertension               | 133 (38.6)                                    | 6 (60)                  | 0.198 |
| CAD                        | 37 (10.7)                                     | 1 (10)                  | 1     |
| CHF                        | 17 (4.9)                                      | 0 (0)                   | 1     |
| CKD                        | 132 (38.3)                                    | 3 (30)                  | 0.748 |
| Hematological malignancy   | 51 (14.8)                                     | 3 (30)                  | 0.183 |
| Solid organ malignancy     | 18 (5.2)                                      | 1 (10)                  | 0.427 |
| Diabetes mellitus          | 79 (22.9)                                     | 2 (20)                  | 1     |
| Liver disease              | 12 (3.5)                                      | 0 (0)                   | 1     |
| Autoimmune disease         | 35 (10.1)                                     | 2 (20)                  | 0.280 |
| Immunosuppressed           | 207 (60)                                      | 8 (80)                  | 0.326 |
| CCI                        | 4 [3, 6]                                      | 4.5 [4, 7]              | 0.215 |
| <b>Days till treatment</b> | 1 [0, 2]                                      | 0 [0, 2]                | 0.993 |
| <b>Vaccination</b>         |                                               |                         | 0.270 |
| None                       | 40 (11.6)                                     | 3 (30)                  |       |
| 1 dose                     | 8 (2.3)                                       | 0 (0)                   |       |
| 2 doses                    | 39 (11.3)                                     | 1 (10)                  |       |
| 3 doses                    | 155 (45.1)                                    | 6 (60)                  |       |
| 4 doses                    | 84 (24.4)                                     | 0 (0)                   |       |
| 5 doses                    | 18 (5.3)                                      | 0 (0)                   |       |

3RDV: 3-day remdesivir regimen, SD: standard deviation, IQR: Interquartile range, COPD: chronic obstructive pulmonary disease, CAD: coronary artery disease, CHF: congestive heart failure, CKD: chronic kidney disease, CCI: Charlson comorbidity index

**Supplementary Table 2:** Univariable analysis in the group of NMV/r treated patients depending on the primary outcome of disease hospitalization at 30 days.

|                            | N (%) or mean $\pm$ SD or median [IQR 25, 75] |                        | p     |
|----------------------------|-----------------------------------------------|------------------------|-------|
|                            | No hospitalization<br>(160)                   | Hospitalization<br>(5) |       |
| <b>Age (years)</b>         | 65 $\pm$ 16                                   | 70.6 $\pm$ 14.5        | 0.442 |
| <b>Male gender</b>         | 96 (60)                                       | 4 (80)                 | 0.649 |
| <b>Medical history</b>     |                                               |                        |       |
| COPD/asthma                | 22 (13.8)                                     | 0 (0)                  | 1     |
| Hypertension               | 78 (48.8)                                     | 4 (80)                 | 0.210 |
| CAD                        | 10 (6.3)                                      | 2 (40)                 | 0.043 |
| CHF                        | 10 (6.3)                                      | 1 (20)                 | 0.295 |
| CKD                        | 0 (0)                                         | 1 (20)                 | 0.03  |
| Hematological malignancy   | 60 (37.5)                                     | 1 (20)                 | 0.652 |
| Solid organ malignancy     | 14 (8.8)                                      | 0 (0)                  | 1     |
| Diabetes mellitus          | 42 (26.3)                                     | 1 (20)                 | 1     |
| Liver disease              | 4 (2.5)                                       | 0 (0)                  | 1     |
| Autoimmune disease         | 13 (8.1)                                      | 0 (0)                  | 1     |
| Immunosuppressed           | 75 (46.9)                                     | 2 (40)                 | 1     |
| CCI                        | 4 [2, 5]                                      | 5 [3, 6]               | 0.111 |
| <b>Days till treatment</b> | 1 [0, 2]                                      | 1 [0, 2]               | 0.909 |
| <b>Vaccination</b>         |                                               |                        | 0.022 |
| None                       | 16 (10)                                       | 1 (20)                 |       |
| 1 dose                     | 1 (0.6)                                       | 0 (0)                  |       |
| 2 doses                    | 7 (4.4)                                       | 2 (40)                 |       |
| 3 doses                    | 81 (50.6)                                     | 1 (20)                 |       |
| 4 doses                    | 42 (26.3)                                     | 1 (20)                 |       |
| 5 doses                    | 13 (8.1)                                      | 0 (0)                  |       |

NMV/r: nirmatrelvir/ritonavir regimen, SD: standard deviation, IQR: Interquartile range, COPD: chronic obstructive pulmonary disease, CAD: coronary artery disease, CHF: congestive heart failure, CKD: chronic kidney disease, CCI: Charlson comorbidity index
